# Supplementary material for: Zebra Alphaherpesviruses (EHV-1 and EHV-9): Genetic Diversity, Latency and Co-Infections
Source: PubMed Central journal article supplement (PMC5035975; doi:10.3390/v8090262), 2016-09-20
Supplement: viruses-08-00262-s001.pdf [file viruses-08-00262-s001.pdf]

# Supplementary Materials: Zebra Alphaherpesviruses (EHV-1 and EHV-9): Genetic Diversity, Latency and Co-Infections

Azza Abdelgawad, Armando Damiani, Simon Y. W. Ho, Günter Strauss, Claudia A. Szentiks, Marion L. East, Nikolaus Osterrieder and Alex D. Greenwood

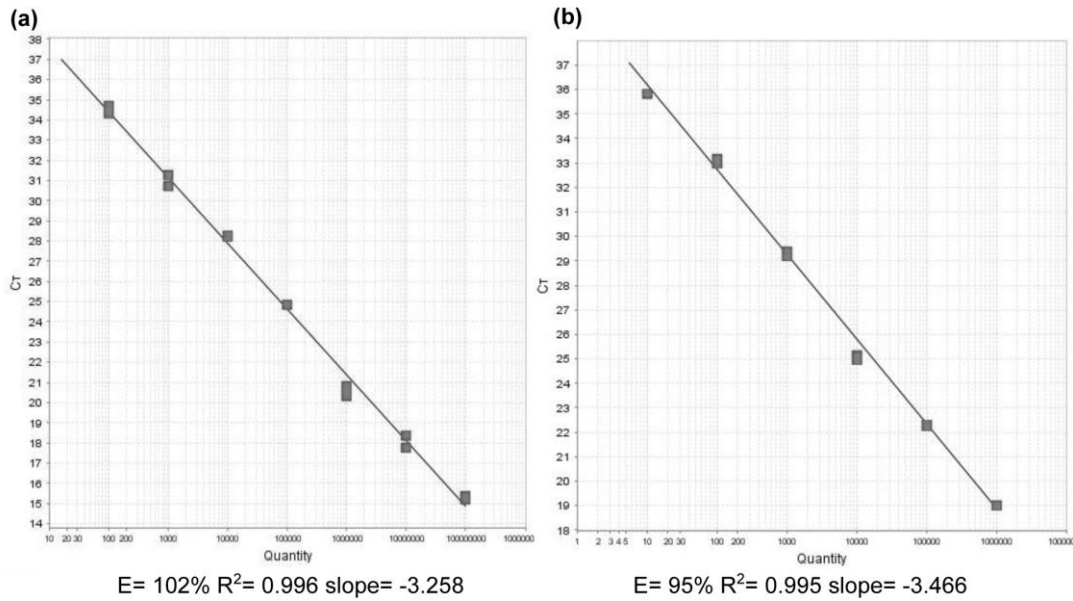

**Figure S1.** The quantitative real-time PCR (qPCR) standardizations. The standard curve of 10-fold serial dilutions of (a) *gB* and (b) ORF63 are shown with a correlation coefficient ( $R^2$ ) of 0.996 and 0.995, respectively.

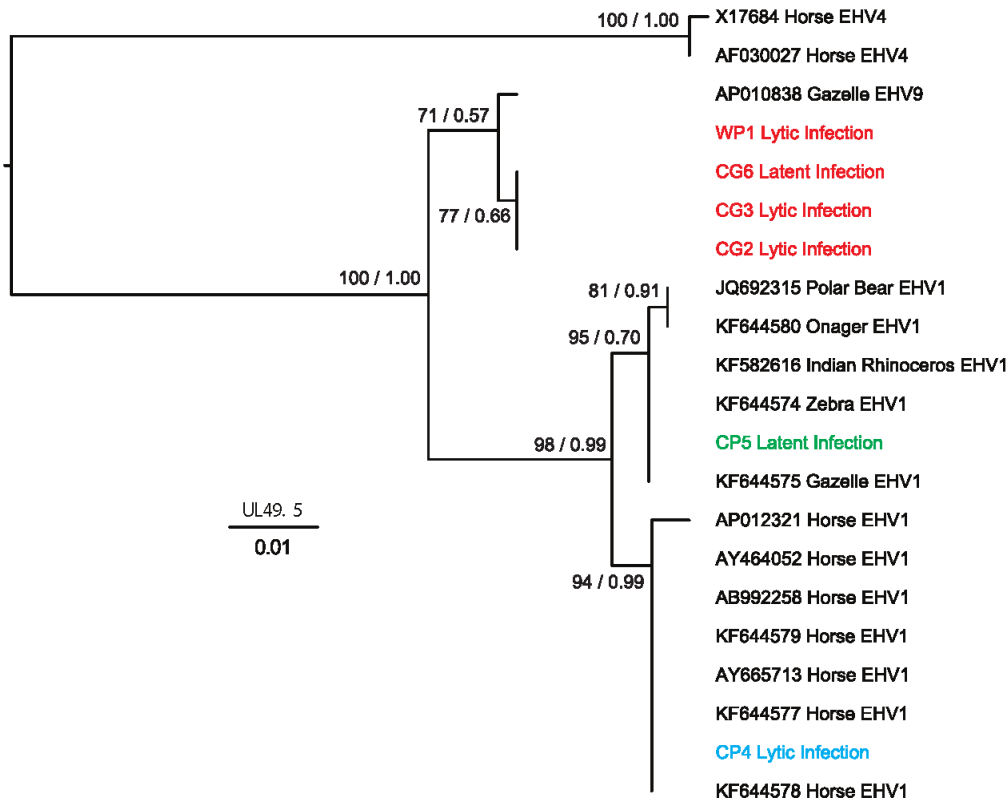

**Figure S2.** Phylogenetic tree inferred using maximum likelihood from nucleotide sequences of *UL49.5* gene for the six zebras WP1, CG2, CG3 (EHV-9 lytic infection), CP4 (EHV-1 lytic and EHV-9 latent infection), CP5, and CG6 (EHV-1 and EHV-9 latent infection, respectively) and other equine herpesviruses. The novel EHV-9 sequences are in **red**, the novel EHV-1-horse like zebra sequence is in **blue**, and the novel zebra-borne EHV-1 sequence is in **green**. Selected nodes are labeled with maximum likelihood bootstrap support values and posterior probabilities, separated by a slash “/”.

**Table S1.** List of equid animals analyzed in the study.

| Species/subspecies               | Origin                            | Number of Tested Animals |
|----------------------------------|-----------------------------------|--------------------------|
| <i>Equus quagga</i>              | Wild plains zebra (WP)            | 7 *                      |
| <i>Equus quagga boehmi</i>       | Captive plains zebra (CP)         | 3; 1 *                   |
| <i>Equus grevyi</i>              | Captive Grevy’s zebra (CG)        | 3                        |
| <i>Equus zebra hartmannae</i>    | Captive Hartmann’s mountain zebra | 2                        |
| <i>Equus africanus somalicus</i> | Captive Somali wild ass           | 6; 3 *                   |
| <i>Equus africanus asinus</i>    | Captive donkey                    | 3 *                      |

\* Ganglia and lymph nodes were not collected from these animals.

**Table S2.** List of new primers and probes used in the study.

| Primer     | Sequence                   |
|------------|----------------------------|
| <i>Pol</i> |                            |
| AZ11 (F)   | 5'-AATGTGCGATCTCAGCTTTG-3' |
| AZ14 (R)   | 5'-GATCTTTTGTGTACGACGA-3'  |
| AZ1 (F)    | 5'-TACAACAAAAGATCTACCAG-3' |
| AZ2 (R)    | 5'-GATAGCCAAAGCCACGCCTT-3' |
| AZ12 (F)   | 5'-CGTGGCTTTGGCTATCCATA-3' |
| AZ15 (R)   | 5'-ATCTCCTGTCTGCTGTACTC-3' |
| AZ9 (F)    | 5'-AGGTCCTCTGGTTAGTTGC-3'  |

|                     |                                                                                                                                      |
|---------------------|--------------------------------------------------------------------------------------------------------------------------------------|
| AZ17 (R)            | 5'-TTAAATTTACACAGACATG-3'                                                                                                            |
| <i>gB</i>           |                                                                                                                                      |
| gB1 (F)             | 5'-CCATGTCAACGCACTCCC-3'                                                                                                             |
| gB1 (R)             | 5'-ACAATATCACCGGTGGACAG-3'                                                                                                           |
| gB2 (F)             | 5'-CTGTCCACCGGTGATATTGT-3'                                                                                                           |
| gB2b (R)            | 5'-GGTACGGACAGGAGAGACCT-3'                                                                                                           |
| gB (F)              | 5'-CTTGTGAGATCTAACCGCAC-3'                                                                                                           |
| gB (R)              | 5'-GGGTATAGAGCTTTCATGGGG-3'                                                                                                          |
| gB3 (F)             | 5'-AGATATGTAATGCAGATCCG-3'                                                                                                           |
| gB3b (R)            | 5'-AAATATGAGGTCACACTTT-3'                                                                                                            |
| <i>ORF69–ORF74</i>  |                                                                                                                                      |
| US3 (F)             | 5'-GACCACCTAACCGACTGGTT-3'                                                                                                           |
| US3 (R)             | 5'-CGCGTGTAGGGCTTGCGCTC-3'                                                                                                           |
| US4 (F)             | 5'-CTACCCCTGCTTCAACGCG-3'                                                                                                            |
| US4 (R)             | 5'-TGTGTGACTCCCACGAGTGA-3'                                                                                                           |
| US5 (F)             | 5'-CTTACCCAAATACGCTGAGG-3'                                                                                                           |
| US6 (R)             | 5'-TCTCGTATGTTGACGAGCCCA-3'                                                                                                          |
| US6 (F)             | 5'-GCCGCTACAACCACAGCTGT-3'                                                                                                           |
| US7 (R)             | 5'-AAGCGAAGTTGGAAGTTGAG-3'                                                                                                           |
| US8 (F)             | 5'-TTAGTGGCTGCGACCACGCT-3'                                                                                                           |
| US8 (R)             | 5'-ATCCGGAGGCACGGGTCTTG-3'                                                                                                           |
| US9 (F)             | 5'-CCGATAACCACCCTGGATT-3'                                                                                                            |
| US10 (R)            | 5'-CCCCACGCATCGAGTACTGT-3'                                                                                                           |
| US11 (F)            | 5'-AGTCCAACAAGTTGAACTTT-3'                                                                                                           |
| US11 (R)            | 5'-TTCATAAAGTGATTTGCGGT-3'                                                                                                           |
| LAT-specific primer | 5'-CTGGCTGGTCGAAAGGCTCG-3'                                                                                                           |
| <i>qPCR</i>         |                                                                                                                                      |
| ORF63_LAT (F)       | 5'-GTGTCTTCGTGAAACATCGG-3'                                                                                                           |
| ORF63_LAT (R)       | 5'-TGCGGAACATTGTTATGGAT-3'                                                                                                           |
| ORF63_LAT (probe)   | 5'FAM-TCCTCGTTACAGCCATGCTCGC-TAMRA3'                                                                                                 |
| ORF63 (oligo)       | 5'GATGAGATCCGTGACAAAGGGCACAGTGTCTTCGTGAAACATCGGCCA<br>AAACTGGCGAGTGAGCTCTTCTCGTTACAGCCATGCTCGCACAGTGTAT<br>CCATAACAATGTTCCGCATCAC-3' |
| B2M (F)             | 5'-ATG GAAAGCCAAATTCCTG-3'                                                                                                           |
| B2M (R)             | 5'-ACCGTTCGACTTTCATCTTC-3'                                                                                                           |
| B2M (probe)         | 5'HEX-TGGGTCCATCCGCCTGAGA-BHQ13'                                                                                                     |
| B2M (oligo)         | 5'-AGAGAATGGAAAGCCAAATTCCTGAACTGCTATGTCTCTGGGTCCA<br>TCCGCCTGAGATTGAAATTGATTTGCTAAAGAATGGAGAGAAGATGAAA<br>GTCGACCGGTCAGAC-3'         |
